# Supplementary material for: A Temperate Sinorhizobium Phage, AP-16-3, Closely Related to Phage 16-3: Mosaic Genome and Prophage Analysis
Source: MDPI journal article supplement (doi:10.3390/v15081701), 2023-08-06
Supplement: s1 [file s1]

Table S2. PhRS abundance in the genomes of *Sinorhizobium* spp., *Rhizobium* spp. and *Mesorhizobium* sp. strains (according to PHASTER)

| Species | Strain                | BioSample    | Replicon<br>(chromosome/plasmid) | Number of prophages |                       |                        |
|---------|-----------------------|--------------|----------------------------------|---------------------|-----------------------|------------------------|
|         |                       |              |                                  | on<br>replicon      | PhRS-16-3-<br>like*** | PhRS-16-3-<br>orph**** |
|         | Rm2011                | SAMN02603522 | chr                              | 1                   | 0                     | 0                      |
|         |                       |              | pSymA                            | 4                   | 0                     | 0                      |
|         |                       |              | pSymB                            | 1                   | 0                     | 0                      |
|         | Rm1021                | SAMEA3283068 | chr                              | 1                   | 0                     | 0                      |
|         |                       |              | pSymA                            | 4                   | 0                     | 0                      |
|         |                       |              | pSymB                            | 2                   | 0                     | 0                      |
|         | AK76*                 | SAMN17104055 | chr                              | 2                   | 1 <sup>1/2</sup>      | 0                      |
|         |                       |              | pSymA                            | 3                   | 0                     | 0                      |
|         |                       |              | pSymB                            | 1                   | 0                     | 0                      |
|         |                       |              | pAK76                            | 3                   | 0                     | 0                      |
|         | L6-AK89*              | SAMN22420025 | chr                              | 2                   | 0                     | 0                      |
|         |                       |              | pCpl                             | 3                   | 0                     | 0                      |
|         |                       |              | pSymA                            | 0                   | 0                     | 0                      |
|         |                       |              | pSymB                            | 3                   | 0                     | 0                      |
|         | AK83* <sup>φ</sup>    | SAMN00017059 | chr 1                            | 8                   | 0                     | 0                      |
|         |                       |              | chr 2                            | 2                   | 0                     | 0                      |
|         |                       |              | chr 3                            | 7                   | 0                     | 0                      |
|         |                       |              | pSINME01                         | 3                   | 0                     | 0                      |
|         |                       |              | pSINME02                         | 0                   | 0                     | 0                      |
|         | AK21* <sup>φ</sup>    | SAMN08428886 | chr                              | 9                   | 0                     | 2                      |
|         |                       |              | pSymA                            | 2                   | 0                     | 0                      |
|         |                       |              | pSymB                            | 2                   | 0                     | 0                      |
|         |                       |              | pSmeAK21a                        | 2                   | 0                     | 0                      |
|         |                       |              | pSmeAK21b                        | 2                   | 0                     | 0                      |
|         | AK57* <sup>φ</sup>    | SAMN24288876 | chr                              | 4                   | 0                     | 2                      |
|         |                       |              | pSymA                            | 6                   | 0                     | 0                      |
|         |                       |              | pSymB                            | 3                   | 0                     | 0                      |
|         | S35m** <sup>φ</sup>   | SAMN16812329 | chr                              | 2                   | 0                     | 1                      |
|         |                       |              | pSymA                            | 2                   | 0                     | 0                      |
|         |                       |              | pSymB                            | 1                   | 0                     | 0                      |
|         | NV1.1.1.**            | this work    | chr                              | 2                   | 1 <sup>1/2</sup>      | 0                      |
|         |                       |              | pSymA                            | 0                   | 0                     | 0                      |
|         |                       |              | pSymB                            | 2                   | 0                     | 0                      |
|         | B401                  | SAMN06227501 | chr                              | 1                   | 0                     | 0                      |
|         |                       |              | pSymA                            | 1                   | 0                     | 0                      |
|         |                       |              | pSymB                            | 3                   | 0                     | 0                      |
|         | USDA1021 <sup>φ</sup> | SAMN07175167 | chr                              | 5                   | 0                     | 2 <sup>2</sup>         |
|         |                       |              | accessoryA                       | 5                   | 0                     | 0                      |
|         |                       |              | psymA                            | 2                   | 0                     | 0                      |
|         |                       |              | psymB                            | 2                   | 0                     | 1                      |
|         | USDA1157 <sup>φ</sup> | SAMN07175169 | chr                              | 8                   | 0                     | 1                      |
|         |                       |              | accessoryA                       | 0                   | 0                     | 0                      |
|         |                       |              | psymA                            | 2                   | 0                     | 0                      |

*Sinorhizobium  
meliloti*

|  |  |  |            |   |                  |                |
|--|--|--|------------|---|------------------|----------------|
|  |  |  | psymB      | 2 | 0                | 1 <sup>1</sup> |
|  |  |  | chr        | 2 | 0                | 0              |
|  |  |  | psymA      | 2 | 0                | 0              |
|  |  |  | psymB      | 2 | 0                | 0              |
|  |  |  | chr        | 8 | 0                | 0              |
|  |  |  | pSymA      | 5 | 0                | 0              |
|  |  |  | pSymB      | 2 | 0                | 0              |
|  |  |  | pSmeRU11a  | 0 | 0                | 0              |
|  |  |  | pSmeRU11b  | 1 | 0                | 0              |
|  |  |  | pSmeRU11c  | 1 | 0                | 0              |
|  |  |  | pSmeRU11d  | 3 | 0                | 0              |
|  |  |  | chr        | 7 | 0                | 0              |
|  |  |  | pSmeSM11c  | 7 | 0                | 0              |
|  |  |  | pSmeSM11d  | 3 | 0                | 0              |
|  |  |  | pSmeSM11a  | 0 | 0                | 0              |
|  |  |  | pSmeSM11b  | 0 | 0                | 0              |
|  |  |  | chr        | 4 | 0                | 0              |
|  |  |  | pSINMEB01  | 0 | 0                | 0              |
|  |  |  | pSINMEB02  | 3 | 0                | 0              |
|  |  |  | chr        | 2 | 0                | 0              |
|  |  |  | pRmeGR4a   | 0 | 0                | 0              |
|  |  |  | pRmeGR4b   | 3 | 0                | 0              |
|  |  |  | pRmeGR4c   | 1 | 0                | 0              |
|  |  |  | pRmeGR4d   | 2 | 0                | 0              |
|  |  |  | chr        | 2 | 0                | 0              |
|  |  |  | pSym       | 4 | 0                | 0              |
|  |  |  | pSymA      | 1 | 0                | 0              |
|  |  |  | chr        | 3 | 0                | 1 <sup>2</sup> |
|  |  |  | pRRI128_1  | 3 | 0                | 0              |
|  |  |  | pRRI128_2  | 1 | 0                | 0              |
|  |  |  | pRRI128_3  | 5 | 0                | 0              |
|  |  |  | pRRI128_4  | 3 | 0                | 0              |
|  |  |  | pRRI128_5  | 2 | 0                | 0              |
|  |  |  | chr        | 2 | 0                | 1 <sup>2</sup> |
|  |  |  | psymA      | 2 | 0                | 0              |
|  |  |  | psymB      | 3 | 0                | 0              |
|  |  |  | chr        | 3 | 0                | 0              |
|  |  |  | accessoryA | 0 | 0                | 0              |
|  |  |  | psymA      | 1 | 0                | 0              |
|  |  |  | psymB      | 4 | 0                | 0              |
|  |  |  | chr        | 4 | 0                | 2 <sup>2</sup> |
|  |  |  | accessoryA | 0 | 0                | 0              |
|  |  |  | psymA      | 4 | 0                | 0              |
|  |  |  | psymB      | 3 | 0                | 0              |
|  |  |  | chr        | 2 | 1 <sup>4</sup>   | 1 <sup>2</sup> |
|  |  |  | pSymA      | 1 | 0                | 0              |
|  |  |  | pSymB      | 2 | 0                | 0              |
|  |  |  | chr        | 3 | 1 <sup>1/2</sup> | 1              |
|  |  |  | pSymA      | 3 | 0                | 0              |
|  |  |  | pSymB      | 1 | 0                | 0              |

|                                 |                          |              |            |     |                  |                |
|---------------------------------|--------------------------|--------------|------------|-----|------------------|----------------|
|                                 | Rm41 <sup>3Φ</sup>       | SAMN07175165 | chr        | 4   | 0                | 2 <sup>2</sup> |
|                                 |                          |              | accessoryA | 1   | 0                | 0              |
|                                 |                          |              | psymA      | 3   | 0                | 0              |
|                                 |                          |              | psymB      | 3   | 0                | 0              |
|                                 | RCAM1115 <sup>Φ</sup>    | SAMN14403975 | chr        | 13  | 0                | 1              |
|                                 |                          |              | p_1        | 4   | 0                | 0              |
|                                 |                          |              | p_2        | 3   | 0                | 0              |
|                                 |                          |              | p_3        | 3   | 0                | 0              |
|                                 | RCAM1750 <sup>Φ</sup>    | SAMN14403976 | chr        | 3   | 0                | 1 <sup>2</sup> |
|                                 |                          |              | p_1        | 5   | 0                | 0              |
|                                 |                          |              | p_2        | 1   | 0                | 0              |
|                                 | ABS7                     | SAMN18865712 | chr        | 4   | 1 <sup>1/2</sup> | 1              |
|                                 |                          |              | pSymA      | 2   | 0                | 0              |
|                                 |                          |              | pSymB      | 1   | 0                | 0              |
|                                 | M270 <sup>Φ</sup>        | SAMN07175164 | chr        | 9   | 0                | 3              |
|                                 |                          |              | accessoryA | 6   | 0                | 0              |
| accessoryB                      |                          |              | 4          | 0   | 0                |                |
| accessoryC                      |                          |              | 1          | 0   | 0                |                |
| psymA                           |                          |              | 9          | 0   | 0                |                |
| psymB                           |                          |              | 1          | 0   | 0                |                |
| M162 <sup>Φ</sup>               | SAMN07175163             | chr          | 6          | 0   | 2 <sup>2</sup>   |                |
|                                 |                          | accessoryA   | 2          | 0   | 0                |                |
|                                 |                          | psymA        | 2          | 0   | 0                |                |
|                                 |                          | psymB        | 1          | 0   | 0                |                |
| T073 <sup>Φ</sup>               | SAMN07175166             | chr          | 5          | 0   | 1 <sup>2</sup>   |                |
|                                 |                          | accessoryA   | 0          | 0   | 0                |                |
|                                 |                          | psymA        | 2          | 0   | 0                |                |
|                                 |                          | psymB        | 1          | 0   | 0                |                |
| In total for <i>S. meliloti</i> |                          | 31           | 121        | 339 | 5 <sup>4</sup>   | 27             |
|                                 |                          |              |            |     |                  | 31             |
| <i>S. medicae</i>               | WSM419 <sup>Φ</sup>      | SAMN02598363 | chr        | 4   | 1 <sup>1/2</sup> | 2 <sup>2</sup> |
|                                 |                          |              | pSMED01    | 1   | 0                | 0              |
|                                 |                          |              | pSMED02    | 5   | 0                | 0              |
|                                 |                          |              | pSMED03    | 3   | 0                | 0              |
|                                 | WSM1115 <sup>Φ</sup>     | SAMN23416899 | chr        | 13  | 0                | 2 <sup>2</sup> |
|                                 |                          |              | pWSM1115_1 | 1   | 0                | 0              |
|                                 |                          |              | pWSM1115_2 | 4   | 0                | 0              |
|                                 |                          |              | pWSM1115_3 | 2   | 0                | 0              |
| <i>S. fredii</i>                | CCBAU 25509              | SAMN03761947 | chr        | 5   | 1 <sup>1/2</sup> | 0              |
|                                 |                          |              | pSF25509a  | 4   | 0                | 0              |
|                                 |                          |              | pSF25509b  | 1   | 0                | 0              |
|                                 | NGR234                   | SAMN02603283 | chr        | 4   | 0                | 0              |
|                                 |                          |              | pNGR234a   | 2   | 0                | 0              |
|                                 |                          |              | pNGR234b   | 2   | 0                | 0              |
|                                 | CCBAU 83666 <sup>Φ</sup> | SAMN07445561 | chr        | 3   | 0                | 1              |
|                                 |                          |              | pSF83666a  | 7   | 0                | 0              |
|                                 |                          |              | pSF83666b  | 4   | 0                | 0              |
|                                 |                          |              | pSF83666d  | 1   | 0                | 1              |
|                                 | NXT3 <sup>Φ</sup>        | SAMN07824032 | chr        | 1   | 0                | 0              |
|                                 |                          |              | pSfreNXT3a | 2   | 0                | 0              |

|                                                        |                   |              |            |            |                       |                       |
|--------------------------------------------------------|-------------------|--------------|------------|------------|-----------------------|-----------------------|
|                                                        | NXT3 <sup>ϕ</sup> | SAMN07824032 | pSfreNXT3b | 2          | 0                     | 0                     |
|                                                        |                   |              | pSfreNXT3c | 0          | 0                     | 0                     |
|                                                        | CCBAU 45436       | SAMN03761948 | chr        | 3          | 0                     | 0                     |
|                                                        |                   |              | pSF45436a  | 5          | 0                     | 0                     |
|                                                        |                   |              | pSF45436b  | 1          | 0                     | 0                     |
|                                                        |                   |              | pSF45436d  | 2          | 0                     | 0                     |
|                                                        |                   |              | pSF45436e  | 1          | 0                     | 0                     |
|                                                        |                   |              |            |            |                       |                       |
| <b>In total for<br/><i>Sinorhizobium</i><br/>spp.:</b> |                   | <b>38</b>    | <b>168</b> | <b>422</b> | <b>7<sup>4</sup></b>  | <b>33</b>             |
|                                                        |                   |              |            |            |                       | <b>39</b>             |
| <i>Rh. lentis</i>                                      | BLR27             | SAMN18139228 | chr        | 3          | 1                     | 0                     |
|                                                        |                   |              | p1         | 0          | 0                     | 0                     |
|                                                        |                   |              | p2         | 0          | 0                     | 0                     |
|                                                        |                   |              | p3         | 0          | 0                     | 0                     |
|                                                        |                   |              | p4         | 1          | 0                     | 0                     |
| <i>Rh</i> spp.                                         | NLR16a            | SAMN18525573 | chr        | 2          | 1                     | 0                     |
|                                                        |                   |              | p1         | 0          | 0                     | 0                     |
|                                                        |                   |              | p2         | 0          | 0                     | 0                     |
|                                                        |                   |              | p3         | 0          | 0                     | 0                     |
|                                                        |                   |              | p4         | 1          | 0                     | 0                     |
|                                                        |                   |              | p5         | 0          | 0                     | 0                     |
|                                                        |                   |              | p6         | 0          | 0                     | 0                     |
|                                                        |                   |              | p7         | 1          | 0                     | 0                     |
| <i>Rh.<br/>leguminosarum</i>                           | OyaliB            | SAMN18139820 | chr        | 1          | 1 <sup>1</sup>        | 0                     |
|                                                        |                   |              | p1         | 0          | 0                     | 0                     |
|                                                        |                   |              | p2         | 0          | 0                     | 0                     |
|                                                        |                   |              | p3         | 2          | 0                     | 0                     |
|                                                        |                   |              | p4         | 0          | 0                     | 0                     |
|                                                        |                   |              | p5         | 0          | 0                     | 0                     |
| <i>Mesorhizobium</i><br>sp.                            | DCY119            | SAMN09829652 | chr        | 4          | 1                     | 1 <sup>5</sup>        |
| <b>In total:</b>                                       |                   | <b>42</b>    | <b>188</b> | <b>437</b> | <b>11<sup>4</sup></b> | <b>34<sup>5</sup></b> |
|                                                        |                   |              |            |            |                       | <b>43</b>             |

<sup>1</sup> - prophage contains an ORF encoding a full-length TfpH protein (in the case of *S. meliloti* ABS7 strain carrying a full-length and a truncated sequence, the truncated sequence is not involved in the phylogenetic analysis); <sup>2</sup> – prophage contains an ORF encoding p019 protein (in the case of *S. meliloti* USDA1021, HM006 and M162 and *S. medicae* WSM419 strains, on one prophage; in the case of *S. meliloti* Rm41 and *S. medicae* WSM1115 strains, on both prophages); <sup>3</sup> – BioSample SAMN07175165 analyzed; <sup>4</sup> – prophage of *S. meliloti* RMO17 with low nucleotide similarity according to BLASTn (Cov < 1%), was not analyze; <sup>5</sup> – PhRS-orph-16-3 of *Mesorhizobium* sp. DCY119 did not analyze; \* – strains isolated from saline Mugodzhar region, part of the introgressive center of alfalfa hybridization in NW Kazakhstan; \*\* – strains isolated from mountainous region of Dagestan, part of the origin of diversity of cultivated plants in the Caucasus; \*\*\* - prophages similar to phage 16-3 according to Phaster; \*\*\*\* - prophages contained single ORFs related to phage 16-3; <sup>ϕ</sup> – genomes contained phiLM21-like prophages
