# Supplementary material for: A Temperate Sinorhizobium Phage, AP-16-3, Closely Related to Phage 16-3: Mosaic Genome and Prophage Analysis
Source: MDPI journal article supplement (doi:10.3390/v15081701), 2023-08-06
Supplement: s1 [file s1]

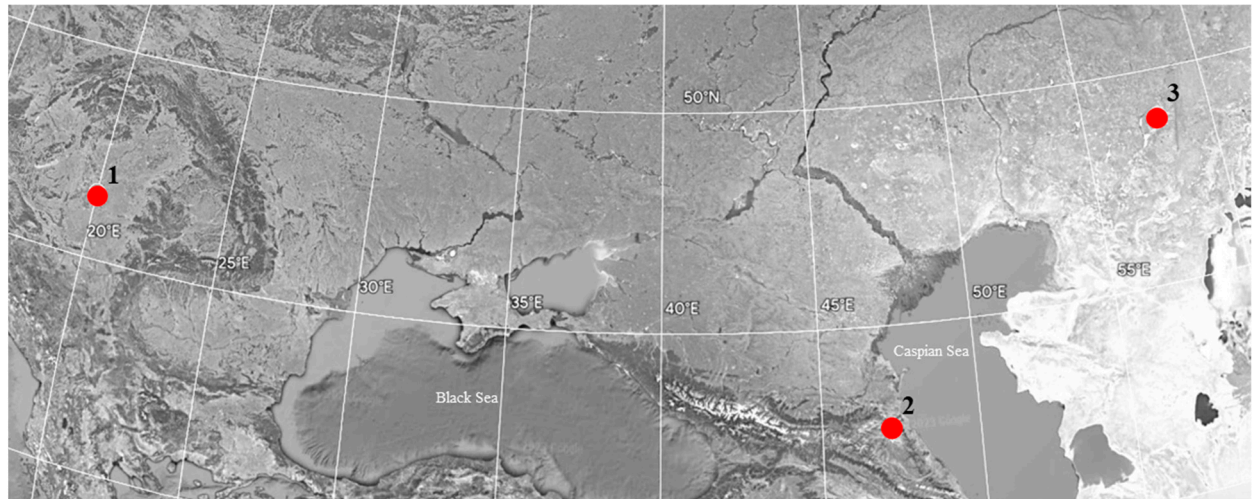

Figure S1. Map showing the soil sampling sites. Sampling sites were marked with points and studied bacteriophages:

1. *Rhizobium* phage 16-3, Hungary
2. *Sinorhizobium* phage AP-16-3, Dagestan, Russia
3. *S. meliloti* NV1.1.1, Mugodzhar, Kazakhstan

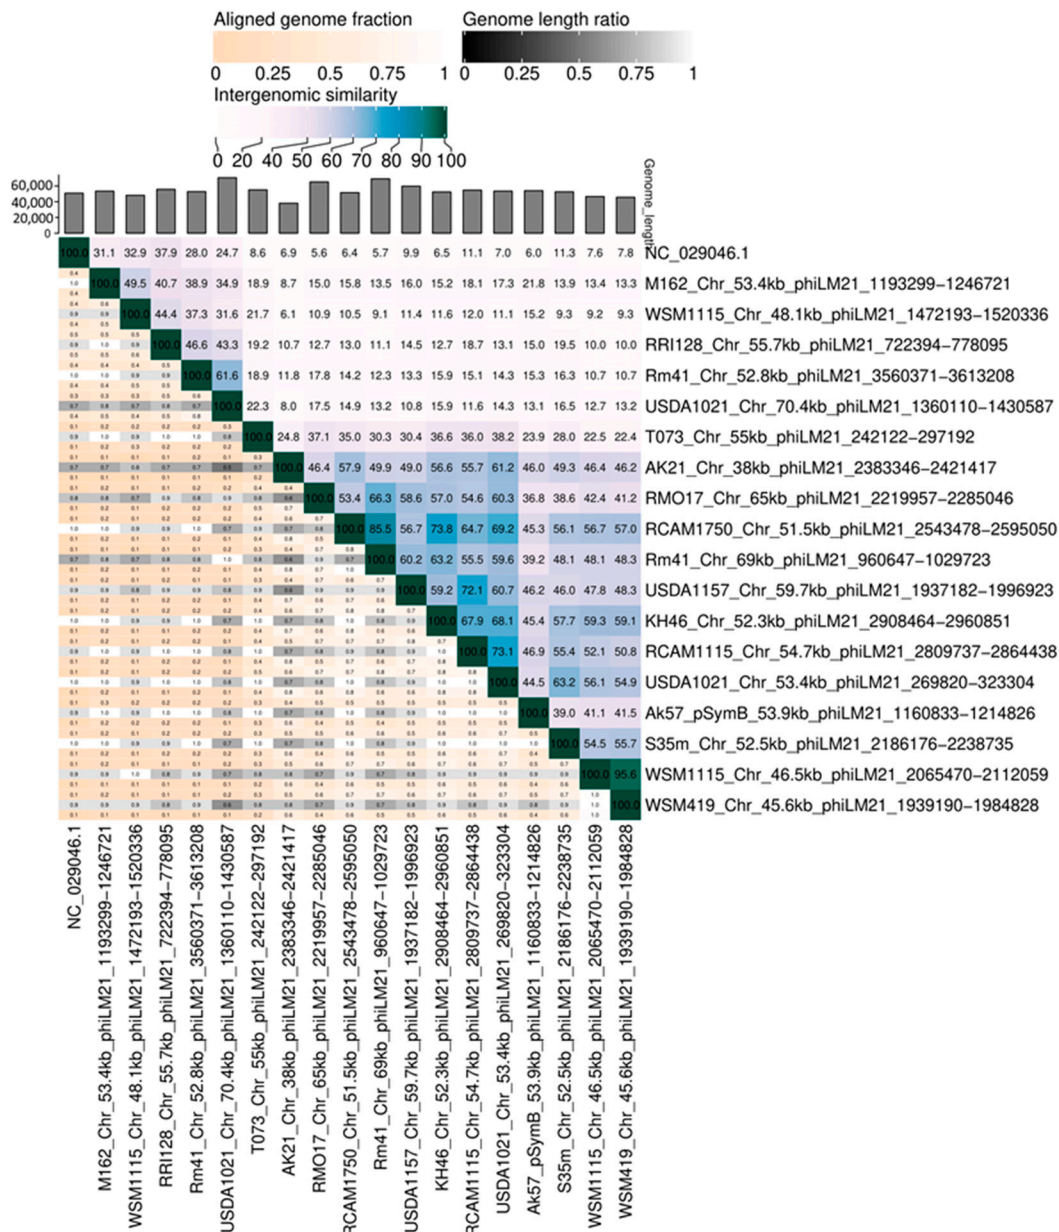

Figure S2. Intergenomic similarity values (right half) and alignment indicators (left half and top annotation) between phage phiLM21 and phiLM21-like prophages calculated using the VIRIDIC program [54].

In the right half, the numbers represent the similarity values for each pair of genomes. The left half presents three indicator values for each pair of genomes, in top-to-bottom order: aligned fraction genome 1 (for the genome found in this row), genome length ratio (for the two genomes in this pair) and aligned fraction genome 2 (for the genome found in this column).
