# Supplementary material for: A Temperate Sinorhizobium Phage, AP-16-3, Closely Related to Phage 16-3: Mosaic Genome and Prophage Analysis
Source: MDPI journal article supplement (doi:10.3390/v15081701), 2023-08-06
Supplement: s1 [file s1]

Table S1. *Sinorhizobium meliloti* lytic phages whose genome has been sequenced and analyzed

| Phage                          | Country | Site              | Source                                     | RefSeq      | Reference |
|--------------------------------|---------|-------------------|--------------------------------------------|-------------|-----------|
| phiM5                          | USA     | -                 | -                                          | MF074189.1  | 27        |
| phiM6                          | USA     | -                 | commercial alfalfa inoculants              | MH700630    | 76        |
| phiM7                          | -       | -                 | soil from an alfalfa field                 | NC_041929.1 | 27        |
| phiM9                          | -       | -                 | commercial alfalfa inoculants              | NC_028676.1 | 25        |
| phiM12                         | USA     | -                 | commercial alfalfa inoculants              | NC_027204.1 | 27        |
| phiM19                         | -       | -                 | -                                          | KR052481.1  | 75        |
| phiN3                          | -       | -                 | soil from an alfalfa field                 | NC_028945.1 | 75        |
| P_ort11                        | Spain   | Huelva            | <i>M. marina</i> -rhizosphere sand samples | NC_049469.1 | 21        |
| PBC5                           | Germany | Strassmoos field  | soil                                       | NC_003324.1 | -         |
| HMSPI-Susan                    | France  | Salses            | agricultural soil                          | MG214783.2  | 28        |
| <i>Rhizobium</i> phage<br>16-3 | Hungary | -                 | soil                                       | NC_011103.1 | 30        |
| phiLM21                        | Poland  | Lubin copper mine | mineral sediments                          | NC_029046.1 | 29        |
