# Supplementary material for: A Temperate Sinorhizobium Phage, AP-16-3, Closely Related to Phage 16-3: Mosaic Genome and Prophage Analysis
Source: MDPI journal article supplement (doi:10.3390/v15081701), 2023-08-06
Supplement: s1 [file s1]

Table S3. Restriction sites in *Sinorhizobium* phage AP-16-3 and *Rhizobium* phage 16-3 genomes

| Endonuclease    | Endonuclease restriction site | Number of restriction sites (in silico) in phage genome: |                             |
|-----------------|-------------------------------|----------------------------------------------------------|-----------------------------|
|                 |                               | <i>Sinorhizobium</i> phage AP-16-3                       | <i>Rhizobium</i> phage 16-3 |
| <i>Eco</i> RI   | GAATTC                        | 25                                                       | 16                          |
| <i>Hind</i> III | AAGCTT                        | 13                                                       | 11                          |
| <i>Gsu</i> I    | CTGGAG                        | 25                                                       | 21                          |
| <i>Bsu</i> RI   | GGCC                          | 387                                                      | 397                         |
| <i>Alu</i> I    | AGCT                          | 180                                                      | 164                         |
| <i>Bam</i> HI   | GGATCC                        | 17                                                       | 20                          |
| <i>Hpa</i> II   | CCGG                          | 298                                                      | 316                         |
| <i>Hinf</i> I   | GANTC                         | 119                                                      | 121                         |
| <i>Hha</i> I    | GCGC                          | 767                                                      | 742                         |
| <i>Hae</i> II   | RGCGCY                        | 159                                                      | 154                         |
| <i>Taq</i> I    | TCGA                          | 437                                                      | 419                         |
