# Supplementary material for: A Temperate Sinorhizobium Phage, AP-16-3, Closely Related to Phage 16-3: Mosaic Genome and Prophage Analysis
Source: Viruses. 2023 Aug 6;15(8):1701. doi: 10.3390/v15081701 (PMC10460002; doi:10.3390/v15081701)
Supplement: Supplementary file 1 [file viruses-15-01701-s001.zip]

Archive with 5 entries (5 files):
- Fig Supl.pdf
- Table S1. Sinorhizobium meliloti lytic phages whose genome has been sequenced and analyzed.pdf
- Table S2. PhRS abundance in the genomes of Sinorhizobium spp., Rhizobium spp. and Mesorhizobium sp. strains (according to PHASTER).pdf
- Table S3. Restriction sites in Sinorhizobium phage AP-16-3 and Rhizobium phage 16-3 genomes.pdf
- Table S4. Open Reading Frames in the genome of Sinorhizobium phage AP-16-3.xlsx
