# Supplementary material for: A Temperate Sinorhizobium Phage, AP-16-3, Closely Related to Phage 16-3: Mosaic Genome and Prophage Analysis
Source: Viruses. 2023 Aug 6;15(8):1701. doi: 10.3390/v15081701 (PMC10460002; doi:10.3390/v15081701)
Supplement: Supplementary file 1 [file viruses-15-01701-s001.zip › Table S4. Open Reading Frames in the genome of Sinorhizobium phage AP-16-3.xlsx]

## Sheet: Table S-4
Table S4. Open Reading Frames in the genome of Sinorhizobium phage AP-16-3
ORF	Start	Stop	Size, bp	F/R	Size, aa	Best match	Length, aa	Identity, %	E-value	ORF in Rhizobium phage 16-3	Predicted function	eggNOG annotation
												Description	COG_category	Preferred_name	Gos	EC	KEGG_ko	KEGG_Pathway	KEGG_Module	KEGG_Reaction	KEGG_rclass	BRITE	KEGG_TC	CAZy	BiGG_Reaction	PFAMs
1	45	506	462	F	154	Rhizobium phage 16-3	154	99.35	4e-94	terS	terminase small subunit	-	-	-	-	-	-	-	-	-	-	-	-	-	-	-
2	522	2087	1566	F	522	Rhizobium phage 16-3	525	98.66	0.0	terL	terminase large subunit	Phage Terminase	S	-	-	-	-	-	-	-	-	-	-	-	-	-
3	2204	3391	1188	F	396	Rhizobium phage 16-3	396	98.96	0.0	p003	portal protein	Phage portal protein	S	-	-	-	-	-	-	-	-	-	-	-	-	-
4	3391	4032	642	F	214	Rhizobium phage 16-3	214	98.6	9e-120	p004	protease	peptidase activity	S	-	GO:0003674,GO:0003824,GO:0005575,GO:0006508,GO:0006807,GO:0008150,GO:0008152,GO:0008233,GO:0016787,GO:0019012,GO:0019538,GO:0043170,GO:0044238,GO:0071704,GO:0140096,GO:1901564	-	-	-	-	-	-	-	-	-	-	-
5	4111	5373	1263	F	421	Rhizobium phage 16-3	421	99.76	0.0	p005a/b	major capsid protein	peptidase activity	S	-	GO:0005575,GO:0019012,GO:0044423,GO:0098015,GO:0098026	-	-	-	-	-	-	-	-	-	-	-
6	5424	5606	183	F	61	Rhizobium phage 16-3	76	98.36	9e-35	p007	hp	-	-	-	-	-	-	-	-	-	-	-	-	-	-	-
7	5614	6153	540	F	180	Sinorhizobium fredii	181	94.44	1e-124	p008	phage head-tail connector protein	-	-	-	-	-	-	-	-	-	-	-	-	-	-	Phage_connect_1
8	6178	6597	420	F	140	Rhizobium phage 16-3	141	100	2e-66	p009	hp	-	-	-	-	-	-	-	-	-	-	-	-	-	-	-
9	6620	6943	324	F	108	Rhizobium phage 16-3	115	99.07	8e-72	p010	head closure protein	Phage head-tail joining protein	S	-	-	-	-	-	-	-	-	-	-	-	-	Phage_H_T_join
10	6952	7365	414	F	138	S. meliloti	138	99.28	3e-94	p011	HK97 gp10 family protein	Bacteriophage HK97-gp10, putative tail-component	S	-	-	-	-	-	-	-	-	-	-	-	-	HK97-gp10_like
11	7387	7788	402	F	134	Rhizobium phage 16-3	135	96.27	2e-87	p012	tt	Protein of unknown function (DUF3168)	S	-	-	-	-	-	-	-	-	-	-	-	-	DUF3168
12	8234	8827	594	F	198	Rhizobium leguminosarum	271	66.84	2e-92	p100	hp	-	-	-	-	-	-	-	-	-	-	-	-	-	-	-
13	8908	9351	444	F	148	Mesorhizobium sp. BR1-1-3	147	71.92	2e-77	p014	tail tube protein	Phage tail tube protein	S	-	-	-	-	-	-	-	-	-	-	-	-	Phage_tail_2
14	9357	9707	351	F	117	S. meliloti	117	96.58	1e-73	p015	gene transfer agent family protein	Phage tail tube protein, GTA-gp10	S	-	-	-	-	-	-	-	-	-	-	-	-	Phage_TAC_11
15	10147	12723	2577	F	859	S. meliloti	859	97.21	0.0	p017	tail length tape measure family protein	peptidoglycan catabolic process	S	-	GO:0008150,GO:0044403,GO:0044409,GO:0044411,GO:0044419,GO:0051701,GO:0051704,GO:0051828,GO:0051830,GO:0085027	-	-	-	-	-	-	-	-	-	-	-
16	13709	14401	693	F	231	S. meliloti	234	97.4	2e-141	p018	tp	-	-	-	-	-	-	-	-	-	-	-	-	-	-	-
17	14568	15137	570	F	190	S. meliloti	190	97.37	1e-131	p020	tp	-	-	-	-	-	-	-	-	-	-	-	-	-	-	-
18	15230	15544	315	F	105	Rhizobium phage 16-3	136	98.1	7e-68	p021	hp	-	-	-	-	-	-	-	-	-	-	-	-	-	-	-
19	15573	17678	2106	F	702	S. meliloti	702	96.15	0.0	h	tail fiber protein h	-	-	-	-	-	-	-	-	-	-	-	-	-	-	-
20	17756	18367	612	F	204	S. meliloti	774	100	3e-127	p023	tail fiber protein	-	-	-	-	-	-	-	-	-	-	-	-	-	-	-
21	20389	20838	450	R	150	S. fredii	204	44.59	2e-36	-	FkbM family methyltransferase	Methyltransferase FkbM domain	J	-	-	-	-	-	-	-	-	-	-	-	-	Methyltransf_21
22	20949	21314	366	R	122	Ensifer sp. NBAIM29	126	47.57	1e-23	-	hp	-	-	-	-	-	-	-	-	-	-	-	-	-	-	-
23	21736	22220	485	F	161	S. meliloti	215	99.38	2e-112	p029	hp	chitin catabolic process	S	-	GO:0000270,GO:0001906,GO:0001907,GO:0005975,GO:0006022,GO:0006026,GO:0006027,GO:0006807,GO:0008150,GO:0008152,GO:0009056,GO:0009057,GO:0009253,GO:0009605,GO:0009607,GO:0009617,GO:0016032,GO:0016052,GO:0019048,GO:0019058,GO:0019076,GO:0030203,GO:0031640,GO:0035821,GO:0035890,GO:0035891,GO:0039633,GO:0040011,GO:0043170,GO:0043207,GO:0044003,GO:0044004,GO:0044033,GO:0044035,GO:0044040,GO:0044041,GO:…	-	-	-	-	-	-	-	-	-	-	-
24	22510	22707	198	F	66	S. meliloti	66	90.91	2e-20	-	hp	-	-	-	-	-	-	-	-	-	-	-	-	-	-	-
25	22707	23108	402	F	134	S. meliloti	134	98.51	5e-80	-	hp	-	-	-	-	-	-	-	-	-	-	-	-	-	-	-
26	23108	23413	306	F	102	S. meliloti	103	100	4e-65	-	hp	-	-	-	-	-	-	-	-	-	-	-	-	-	-	-
27*	23956	24851	896	F	298	Rhizobium phage 16-3	299	90.38	2e-136	p036	protease	Trypsin-like peptidase domain	S	-	-	-	-	-	-	-	-	-	-	-	-	-
28	24869	25264	396	F	132	S. meliloti	153	93.89	8e-67	p038	hp	-	-	-	-	-	-	-	-	-	-	-	-	-	-	-
29	25269	25784	516	F	172	Rhizobium phage 16-3	178	93.6	4e-101	p040	hp	-	-	-	-	-	-	-	-	-	-	-	-	-	-	-
30	25984	26415	432	F	144	S. meliloti	141	91.67	4e-74	p042	hp	-	-	-	-	-	-	-	-	-	-	-	-	-	-	-
31	26534	26881	348	F	116	Rhizobium phage 16-3	121	95.69	8e-77	p043	hp	-	-	-	-	-	-	-	-	-	-	-	-	-	-	-
32	26902	28152	1251	F	417	Sinorhizobium sp. BJ1	419	90.08	0.0	-	metallophosphoesterase	-	-	-	-	-	-	-	-	-	-	-	-	-	-	-
33	28562	28957	396	F	132	Sinorhizobium sp. BJ1	139	91.6	1e-79	-	pyrophosphatase	Mazg nucleotide pyrophosphohydrolase	S	-	-	-	-	-	-	-	-	-	-	-	-	-
34	28996	29628	633	F	211	S. meliloti	281	74.7	2e-126	p048	phosphohydrolase	hydrolase activity	S	-	-	-	-	-	-	-	-	-	-	-	-	-
35	30154	30507	354	F	118	S. meliloti	120	93.14	8e-66	p050	hp	-	-	-	-	-	-	-	-	-	-	-	-	-	-	-
36	30516	31160	645	F	215	Rhizobium phage 16-3	222	99.07	2e-154	p051	hp	dephospho-CoA kinase activity	H	coaE	GO:0003674,GO:0003824,GO:0004140,GO:0006139,GO:0006163,GO:0006164,GO:0006725,GO:0006732,GO:0006753,GO:0006793,GO:0006796,GO:0006807,GO:0008150,GO:0008152,GO:0009058,GO:0009108,GO:0009117,GO:0009150,GO:0009152,GO:0009165,GO:0009259,GO:0009260,GO:0009987,GO:0015936,GO:0015937,GO:0016301,GO:0016310,GO:0016740,GO:0016772,GO:0016773,GO:0018130,GO:0019438,GO:0019637,GO:0019693,GO:0033865,GO:0033866,GO:…	2.7.1.24,2.7.7.87	ko:K00859,ko:K07566	ko00770,ko01100,map00770,map01100	M00120	R00130,R10463	RC00002,RC00078,RC00745	ko00000,ko00001,ko00002,ko01000,ko03009,ko03016	-	-	-	CoaE
37	32551	33654	1104	R	368	S. meliloti	371	100	0.0	int	integrase	Belongs to the 'phage' integrase family	L	-	-	-	-	-	-	-	-	-	-	-	-	Phage_integrase
38*	33851	34211	361	R	120	S. meliloti	189	94.17	6e-65	p056	HNH endonuclease	HNH endonuclease	S	-	-	-	-	-	-	-	-	-	-	-	-	-
39	37754	38530	777	R	259	S. meliloti	259	96.53	0.0	c	C repressor	Peptidase S24-like	K	-	-	-	-	-	-	-	-	-	-	-	-	Peptidase_S24
40	39059	39664	606	R	202	S. meliloti	209	97.52	2e-132	p070	transcriptional regulator	-	-	-	-	-	-	-	-	-	-	-	-	-	-	-
41	39832	40062	231	F	77	Rhizobium phage 16-3	98	100	5e-49	p072	regulator	-	-	-	-	-	-	-	-	-	-	-	-	-	-	-
42	40128	40412	285	F	95	Rhizobium phage 16-3	105	100	5e-65	p073	hp	-	-	-	-	-	-	-	-	-	-	-	-	-	-	-
43	40433	41104	672	F	224	S. meliloti	433	50.49	6e-43	p074	ribosomal protein L7/L12	-	-	-	-	-	-	-	-	-	-	-	-	-	-	-
44	41920	42651	732	F	244	Rhizobium sp. SG741	271	88.93	8e-153	-	ATP-binding protein	AAA domain	S	-	-	-	-	-	-	-	-	-	-	-	-	AAA_24
45	43020	43397	378	F	126	Mesorhizobium sp. BR1-1-3	249	71.19	3e-57	p100	HNH endonuclease	-	-	-	-	-	-	-	-	-	-	-	-	-	-	-
46	43441	43989	549	F	183	S. meliloti	183	97.81	4e-116	-	hp	Protein of unknown function (DUF669)	S	-	-	-	-	-	-	-	-	-	-	-	-	DUF669
47	44216	44614	399	F	133	Rhizobium phage 16-3	133	97.74	1e-81	p079	site-specific recombination directionality factor RDF	exonuclease activity	S	-	-	-	-	-	-	-	-	-	-	-	-	-
48*	45045	46161	1117	F	372	S. meliloti	372	65.12	3e-159	p081	DNA polymerase III subunit beta	DNA polymerase III beta subunit, central domain	S	-	-	-	-	-	-	-	-	-	-	-	-	-
49	46176	46688	513	F	171	Rhizobium sp. 16-449-1b	188	79.88	2e-84	-	HNH endonuclease	HNH endonuclease	S	-	-	-	-	-	-	-	-	-	-	-	-	AP2,HNH_3
50	46730	47644	915	F	305	S. meliloti	317	98.36	0.0	p085	oxidoreductase	-	-	-	-	-	-	-	-	-	-	-	-	-	-	PDDEXK_1
51	47715	48188	474	F	158	S. meliloti	161	99.37	2e-111	p086	RNA polymerase sigma factor	Sigma-70 region 2	K	-	-	-	-	-	-	-	-	-	-	-	-	Sigma70_r2
52	48715	49050	336	F	112	S. meliloti	114	96.43	3e-72	-	hp	Protein of unknown function (DUF2493)	E	-	-	-	-	-	-	-	-	-	-	-	-	DUF2493
53	49062	50795	1734	F	578	S. meliloti	580	97.75	0.0	-	helicase-related protein	Helicase conserved C-terminal domain	KL	-	-	-	ko:K19789	-	-	-	-	ko00000,ko03400	-	-	-	DUF3427,HIT,Helicase_C,PLDc_2,ResIII,UPF0547
54	51047	52255	1209	F	403	Limoniibacter endophyticus	393	90	0.0	-	RNA-splicing ligase RtcB	tRNA-splicing ligase RtcB	S	-	-	6.5.1.3	ko:K14415	-	-	-	-	ko00000,ko01000,ko03016	-	-	-	RtcB
55	52322	52645	324	F	108	Rhizobium sp. S9	121	84.26	4e-62	-	hp	-	-	-	-	-	-	-	-	-	-	-	-	-	-	-
56	52645	53400	756	F	252	Rhizobium phage 16-3	252	88.1	2e-118	p091	exonuclease	-	-	-	-	-	-	-	-	-	-	-	-	-	-	-
57	54105	54758	654	F	218	Rhizobium laguerreae	267	79.03	3e-140	-	DNA methyltransferase	Belongs to the N(4) N(6)-methyltransferase family	L	-	-	-	-	-	-	-	-	-	-	-	-	N6_N4_Mtase
58	54809	55186	378	F	126	S. meliloti	126	98.41	5e-84	p098	hp	-	-	-	-	-	-	-	-	-	-	-	-	-	-	-
59	55505	55666	162	F	54	S. meliloti	221	100	8e-33	-	hp	Protein of unknown function (DUF3223)	S	-	GO:0000003,GO:0003006,GO:0005575,GO:0005622,GO:0005623,GO:0005634,GO:0006996,GO:0006997,GO:0007000,GO:0007275,GO:0008150,GO:0009790,GO:0009791,GO:0009793,GO:0009987,GO:0010154,GO:0016043,GO:0017126,GO:0022414,GO:0032501,GO:0032502,GO:0043226,GO:0043227,GO:0043229,GO:0043231,GO:0044085,GO:0044424,GO:0044464,GO:0048316,GO:0048608,GO:0048731,GO:0048856,GO:0050789,GO:0050794,GO:0051302,GO:0061458,GO:…	-	-	-	-	-	-	-	-	-	-	DUF3223
60	56062	58350	2289	F	763	S. meliloti	784	100	0.0	-	bifunctional DNA primase/polymerase	Phage plasmid primase, P4 family domain protein	L	-	-	-	-	-	-	-	-	-	-	-	-	DUF3987,PriCT_2,Prim-Pol,RepB_primase
61	58675	59142	468	F	156	S. meliloti	165	91.61	3e-97	p103	VRR-NUC domain-containing protein	-	-	-	-	-	-	-	-	-	-	-	-	-	-	-
62	60556	60783	228	F	76	S. meliloti	97	97.37	6e-48	holin	HNH endonuclease	HNH endonuclease	S	-	-	-	-	-	-	-	-	-	-	-	-	-
* - ORFs contain stop codons in the translated sequence according to the eggNOG annotation; COG categories: S - function unknown, J - translation, ribosomal structure and biogenesis, H - coenzyme transport and metabolism, L - replication, recombination and repair, K – transcription, E - amino acid transport and metabolism; tt - tail terminator; tp - tail protein, hp - hypothetical protein
